# Supplementary material for: New Isomeric Dipyridothiazine Dimers — Synthesis, Structural Characterization and Cytotoxicity Screening
Source: Preprints.org preprint supplement (doi:10.20944/preprints202405.0291.v1), 2024-05-06
Supplement: Supplementary file 1 [file supplementary]

# Supplementary Material

## New isomeric dipyridthiazine dimers - synthesis, structural characterization and cytotoxicity screening

Emilia Martula<sup>1</sup>, Beata Morak-Młodawska<sup>2\*</sup>, Małgorzata Jeleń<sup>2</sup>, Paulina Strzyga-Łach<sup>3</sup>, Marta Struga<sup>3</sup>, Katarzyna Żurawska<sup>4</sup>, Anna Kasprzycka<sup>4,5</sup>

<sup>1</sup> Doctoral School of The Medical University of Silesia, Poland, [d201074@365.sum.edu.pl](mailto:d201074@365.sum.edu.pl)

<sup>2</sup> Department of Organic Chemistry, Faculty of Pharmaceutical Sciences, The Medical University of Silesia, Jagiellońska 4, 41-200 Sosnowiec, Poland; [bmłodawska@sum.edu.pl](mailto:bmłodawska@sum.edu.pl) (B.M.M.); [manowak@sum.edu.pl](mailto:manowak@sum.edu.pl) (M.J.)

<sup>3</sup> Chair and Department of Biochemistry, Medical University of Warsaw, 02-097 Warsaw, Poland, [paulina.strzyga-lach@wum.edu.pl](mailto:paulina.strzyga-lach@wum.edu.pl) (P.S.Ł.), [marta.struga@wum.edu.pl](mailto:marta.struga@wum.edu.pl) (M.S.),

<sup>4</sup> Biotechnology Centre, The Silesian University of Technology, Krzywoustego Street 8, 44-100 Gliwice, Poland [katarzyna.hopko@polsl.pl](mailto:katarzyna.hopko@polsl.pl)

<sup>5</sup> Department of Organic Chemistry, Bioorganic Chemistry and Biotechnology, Faculty of Chemistry, Silesian University of Technology, Krzywoustego Street 4, 44-100 Gliwice, Poland, [anna.kasprzycka@sum.edu.pl](mailto:anna.kasprzycka@sum.edu.pl)

### Content

|                                                                                                     |    |
|-----------------------------------------------------------------------------------------------------|----|
| 1. <sup>1</sup> H NMR of 1,3-bis((10H-dipyrido[3,4-b:3',4'-e][1,4]thiazin-10-yl)methyl)benzene (8)  | 2  |
| 2. COSY NMR of 1,3-bis((10H-dipyrido[3,4-b:3',4'-e][1,4]thiazin-10-yl)methyl)benzene (8)            | 4  |
| 3. ROESY NMR of 1,3-bis((10H-dipyrido[3,4-b:3',4'-e][1,4]thiazin-10-yl)methyl)benzene (8)           | 5  |
| 4. <sup>13</sup> C NMR of 1,3-bis((10H-dipyrido[3,4-b:3',4'-e][1,4]thiazin-10-yl)methyl)benzene (8) | 6  |
| 5. HSQC NMR of 1,3-bis((10H-dipyrido[3,4-b:3',4'-e][1,4]thiazin-10-yl)methyl)benzene (8)            | 7  |
| 6. HMBC NMR of 1,3-bis((10H-dipyrido[3,4-b:3',4'-e][1,4]thiazin-10-yl)methyl)benzene (8)            | 8  |
| 7. HR MS of 1,3-bis((10H-dipyrido[3,4-b:3',4'-e][1,4]thiazin-10-yl)methyl)benzene (8)               | 10 |
| 8. Mulliken charges and bond length of compound 8                                                   | 11 |
| 9. Mulliken charges and bond length of isomer-lutidine linker of compound 8                         | 14 |

<sup>1</sup>H NMR of 1,3-bis((10*H*-dipyrido[3,4-b:3',4'-e][1,4]thiazin-10-yl)methyl)benzene (**8**)

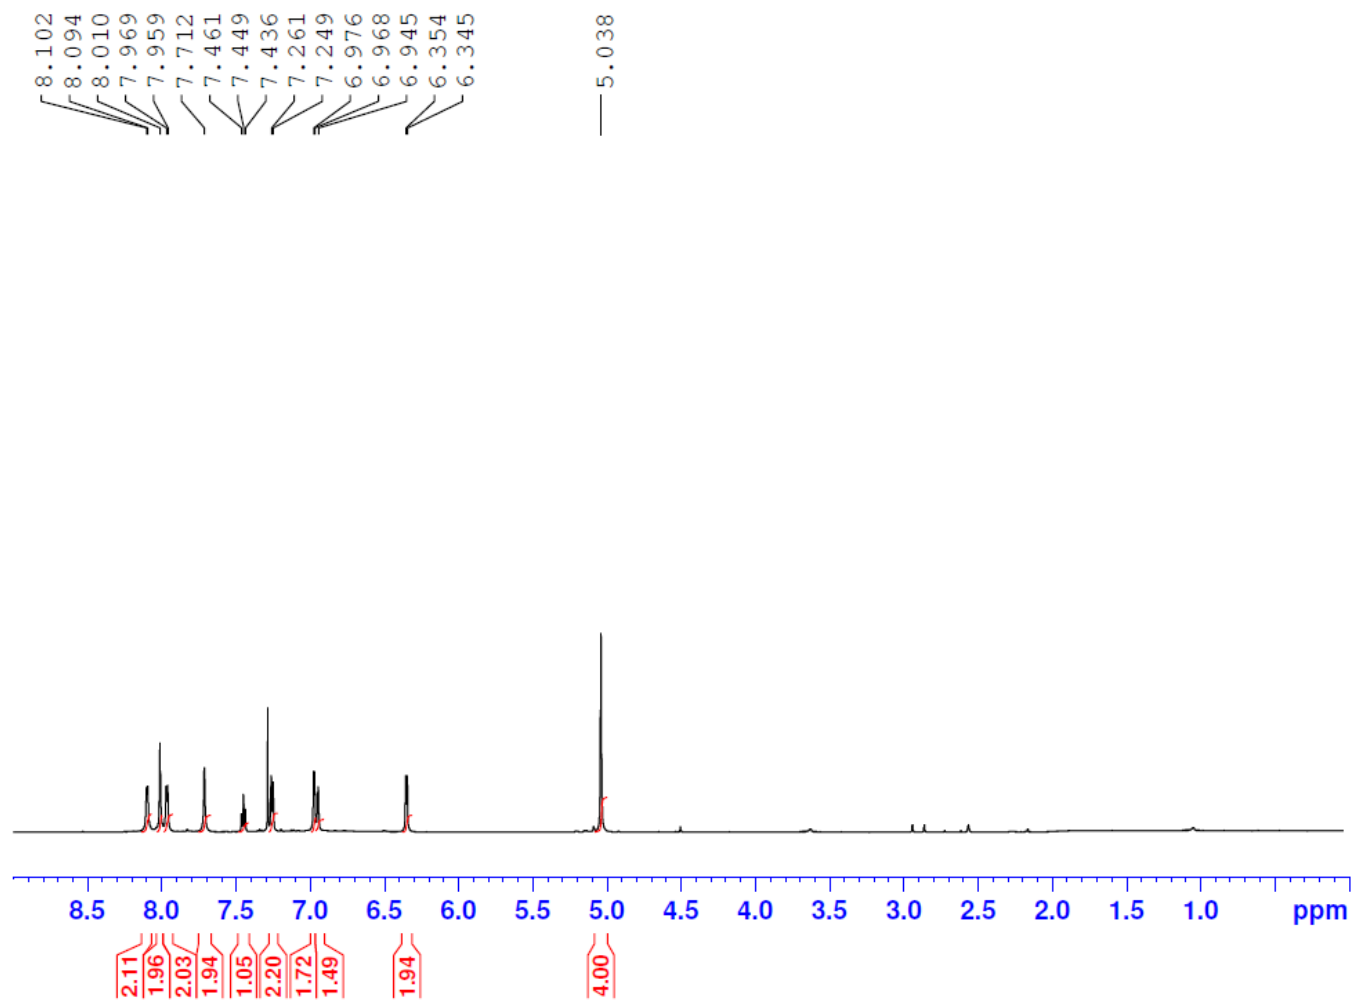

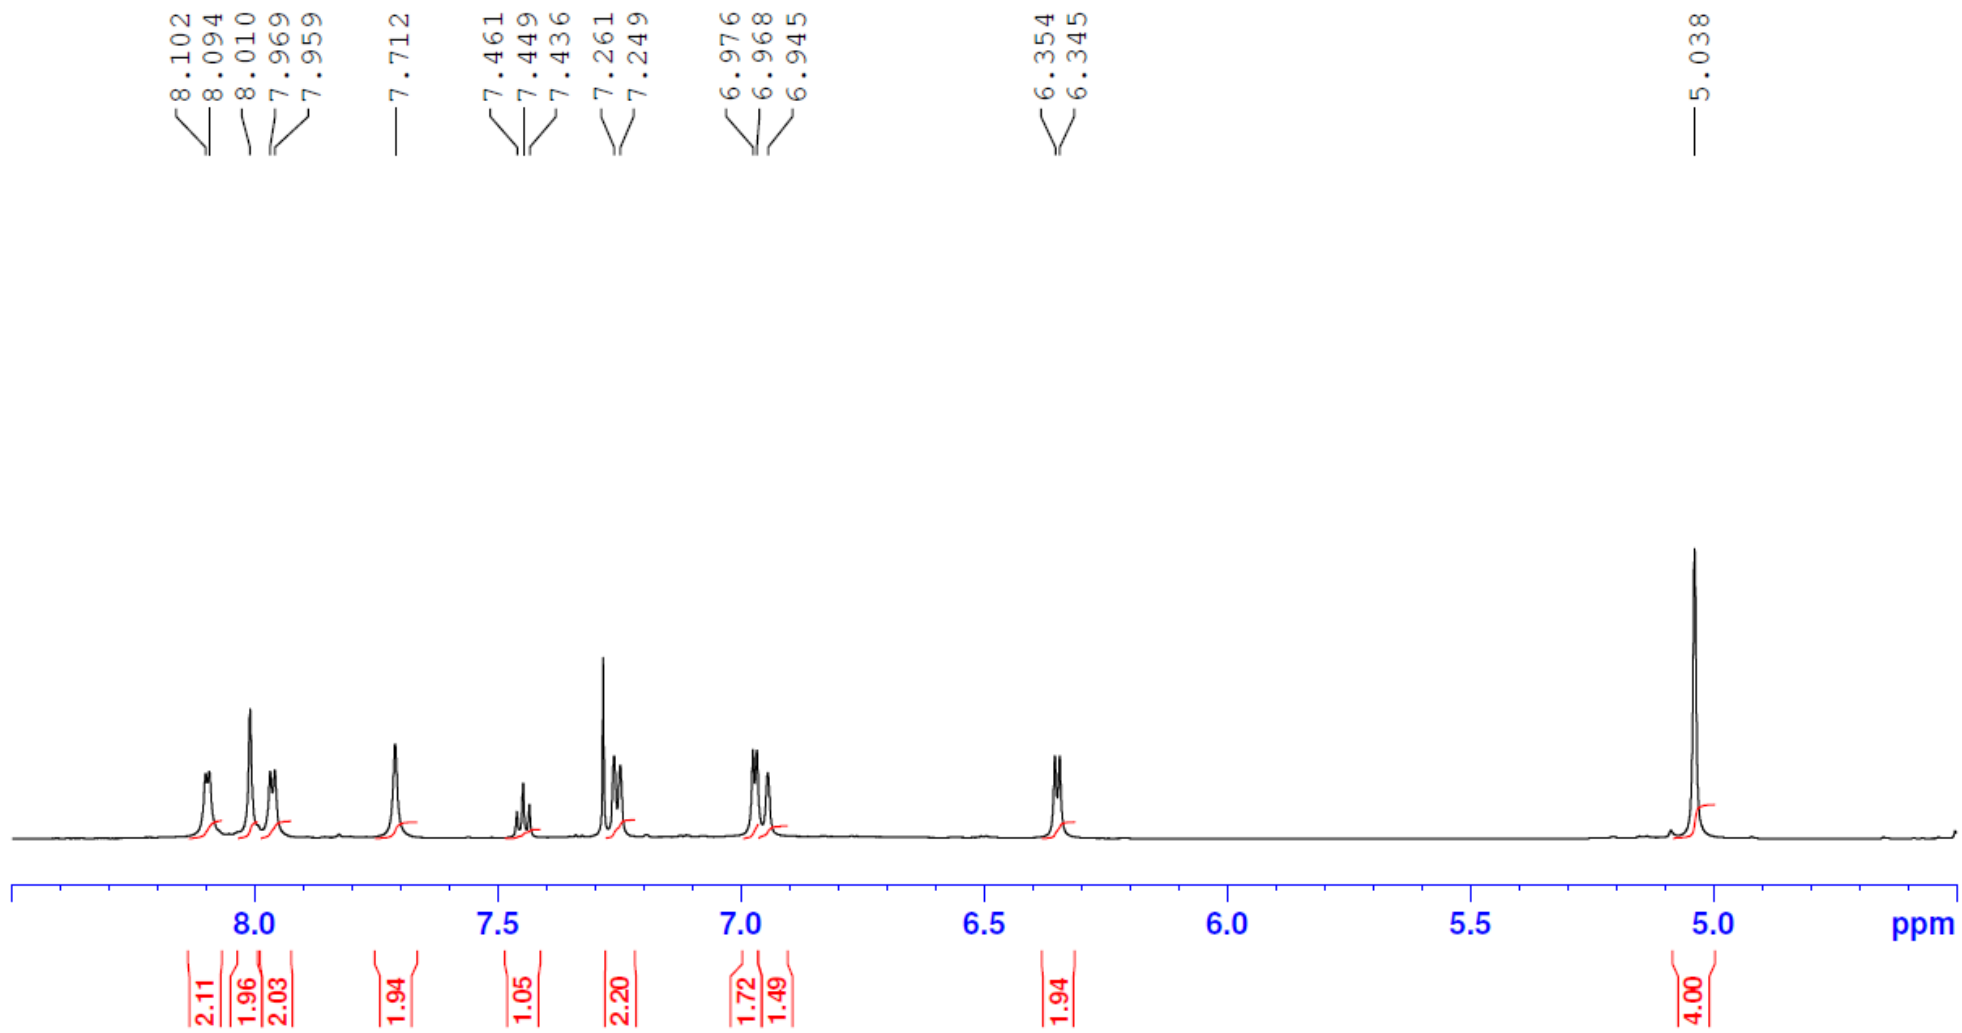

COSY NMR of 1,3-bis((10*H*-dipyrido[3,4-b:3',4'-e][1,4]thiazin-10-yl)methyl)benzene (**8**)

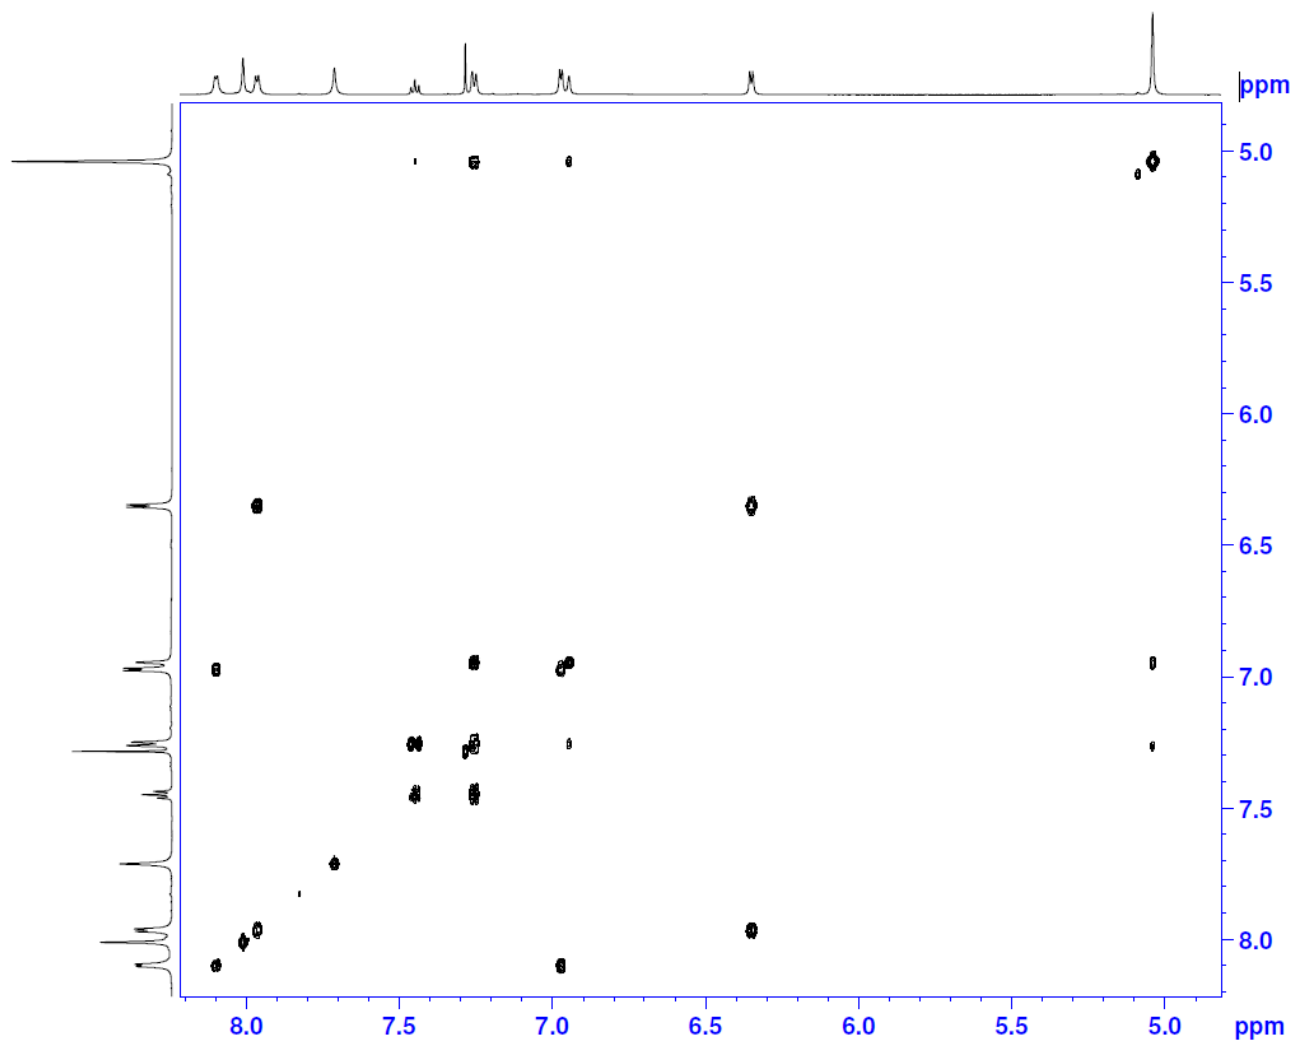

ROESY NMR of 1,3-bis((10*H*-dipyrido[3,4-*b*:3',4'-*e*][1,4]thiazin-10-yl)methyl)benzene (**8**)

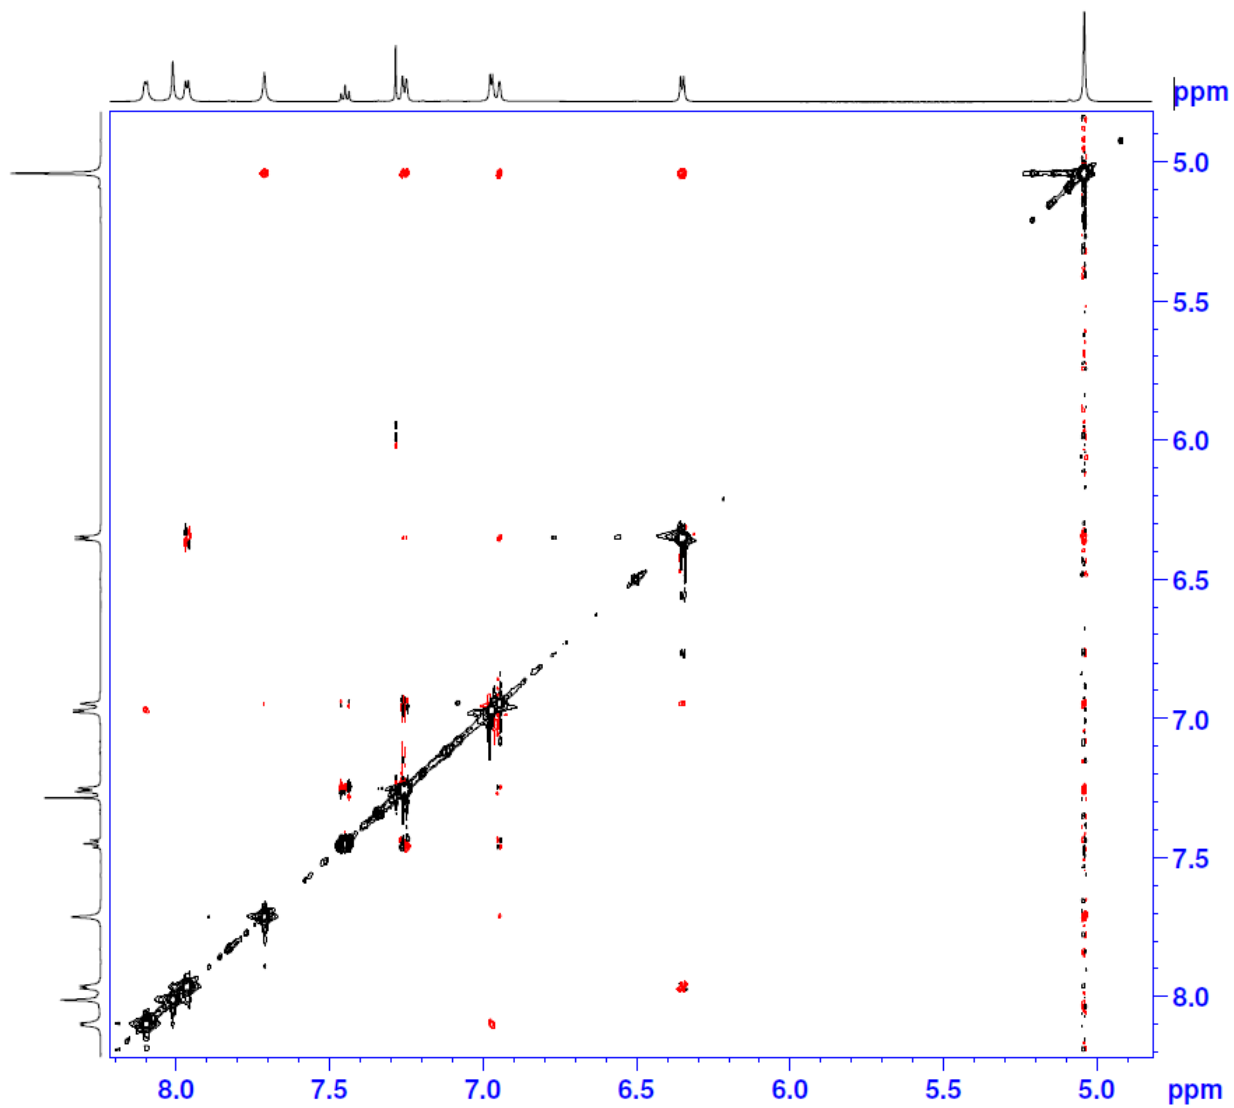

<sup>13</sup>C NMR of 1,3-bis((10*H*-dipyrido[3,4-*b*:3',4'-*e*][1,4]thiazin-10-yl)methyl)benzene (**8**)

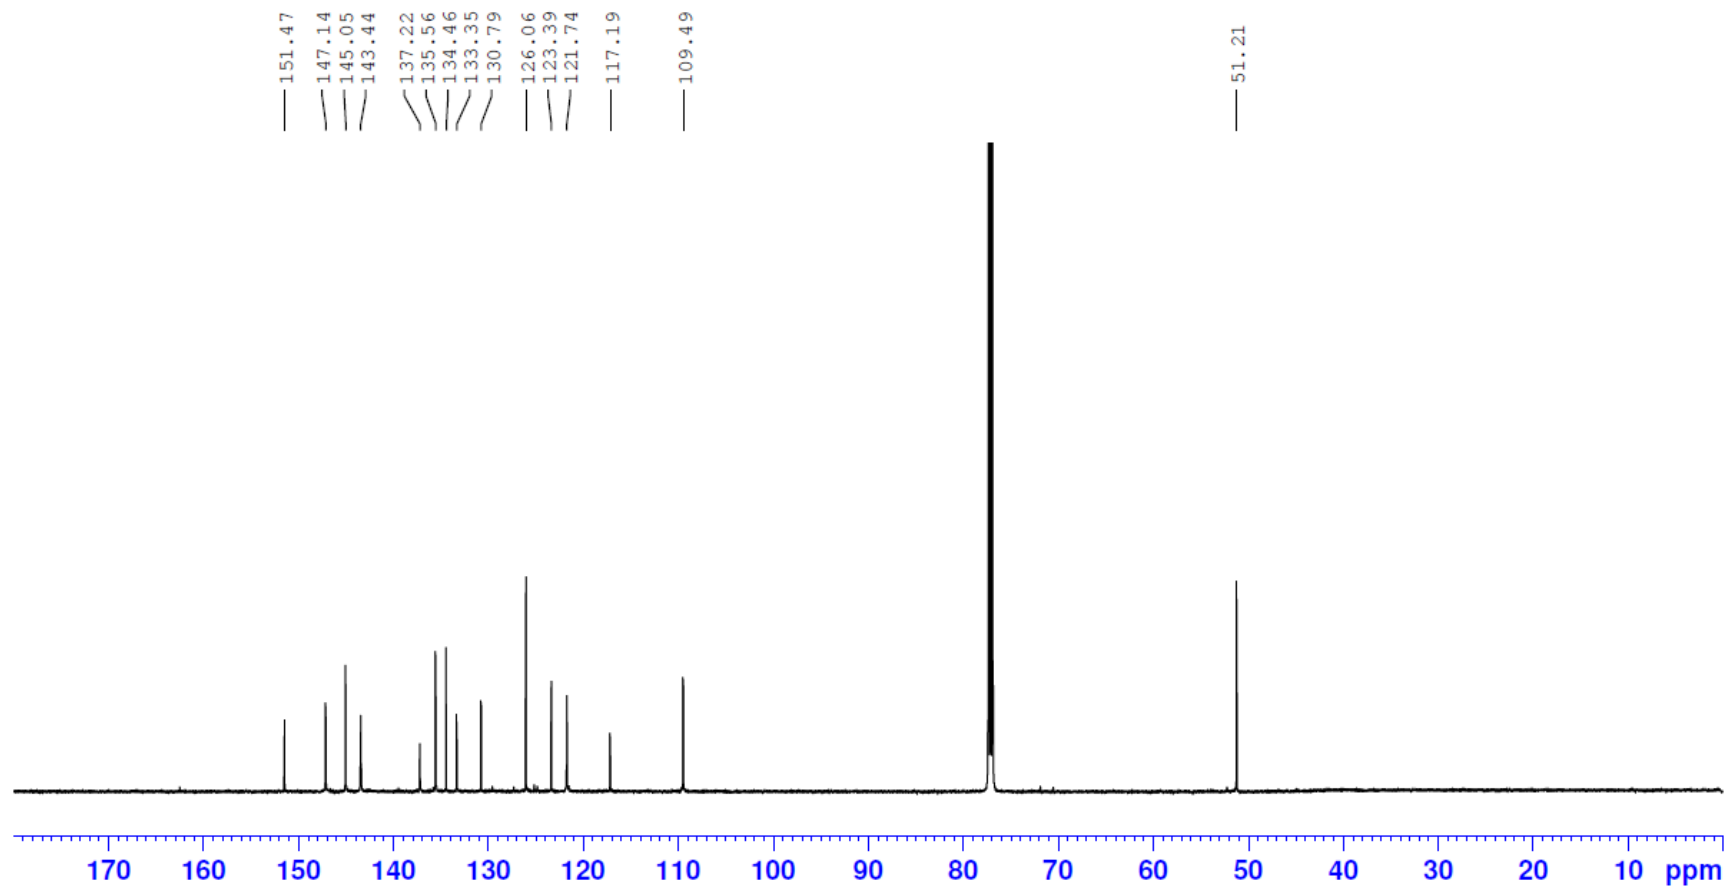

HSQC NMR of 1,3-bis((10*H*-dipyrido[3,4-*b*:3',4'-*e*][1,4]thiazin-10-yl)methyl)benzene (**8**)

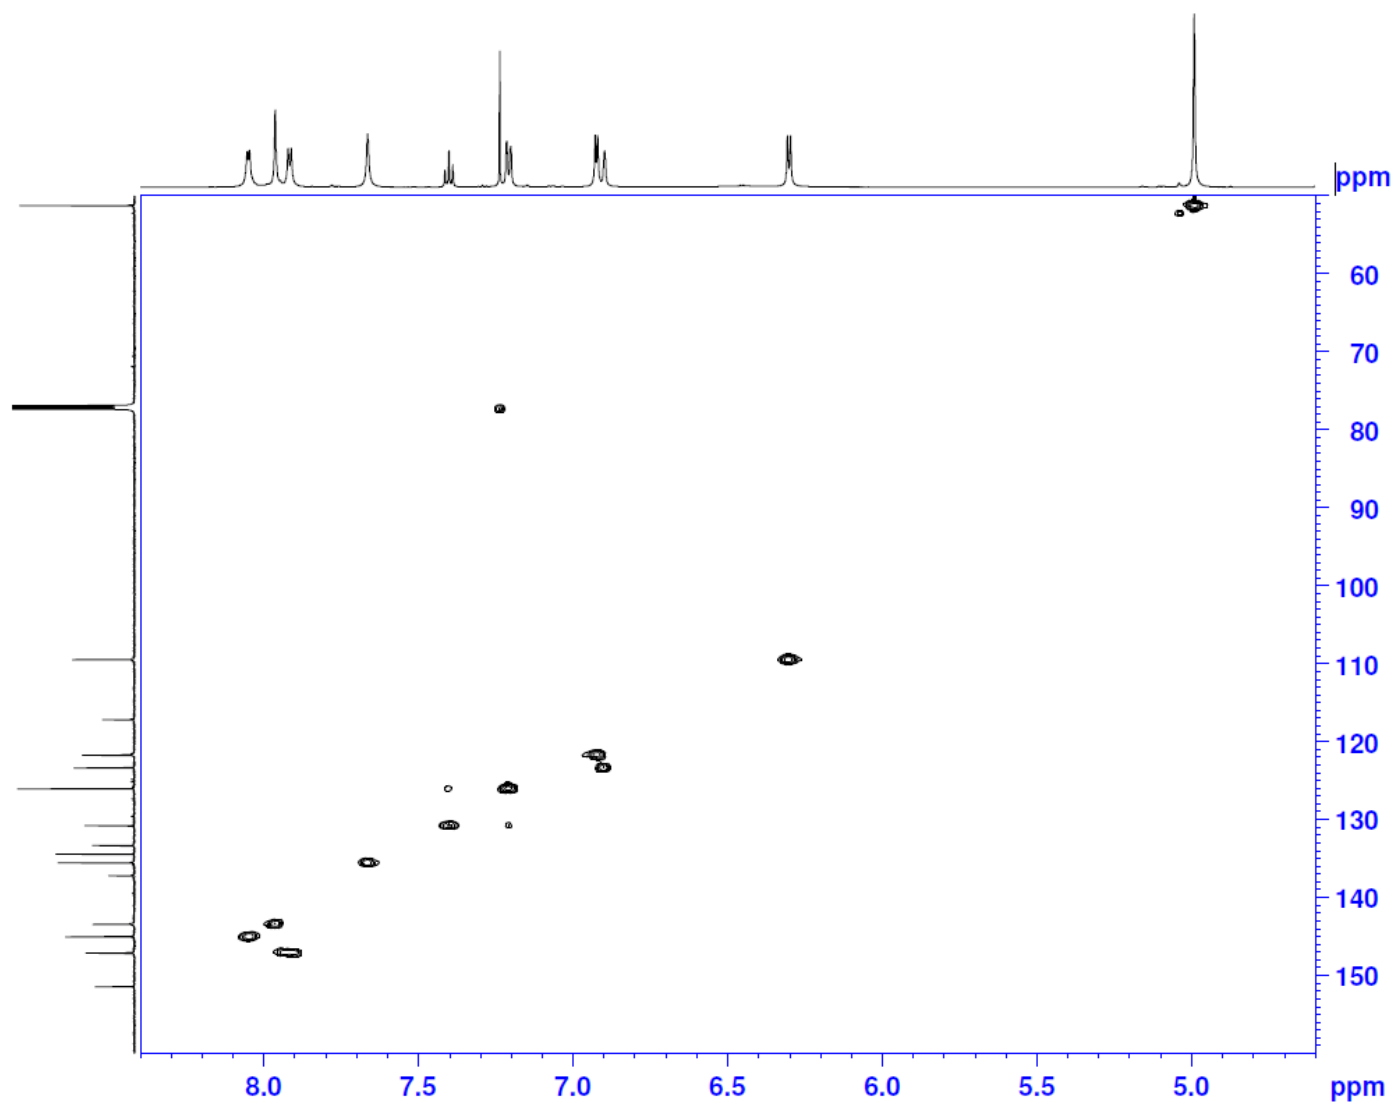

HMBC NMR of 1,3-bis((10*H*-dipyrido[3,4-*b*:3',4'-*e*][1,4]thiazin-10-yl)methyl)benzene (**8**)

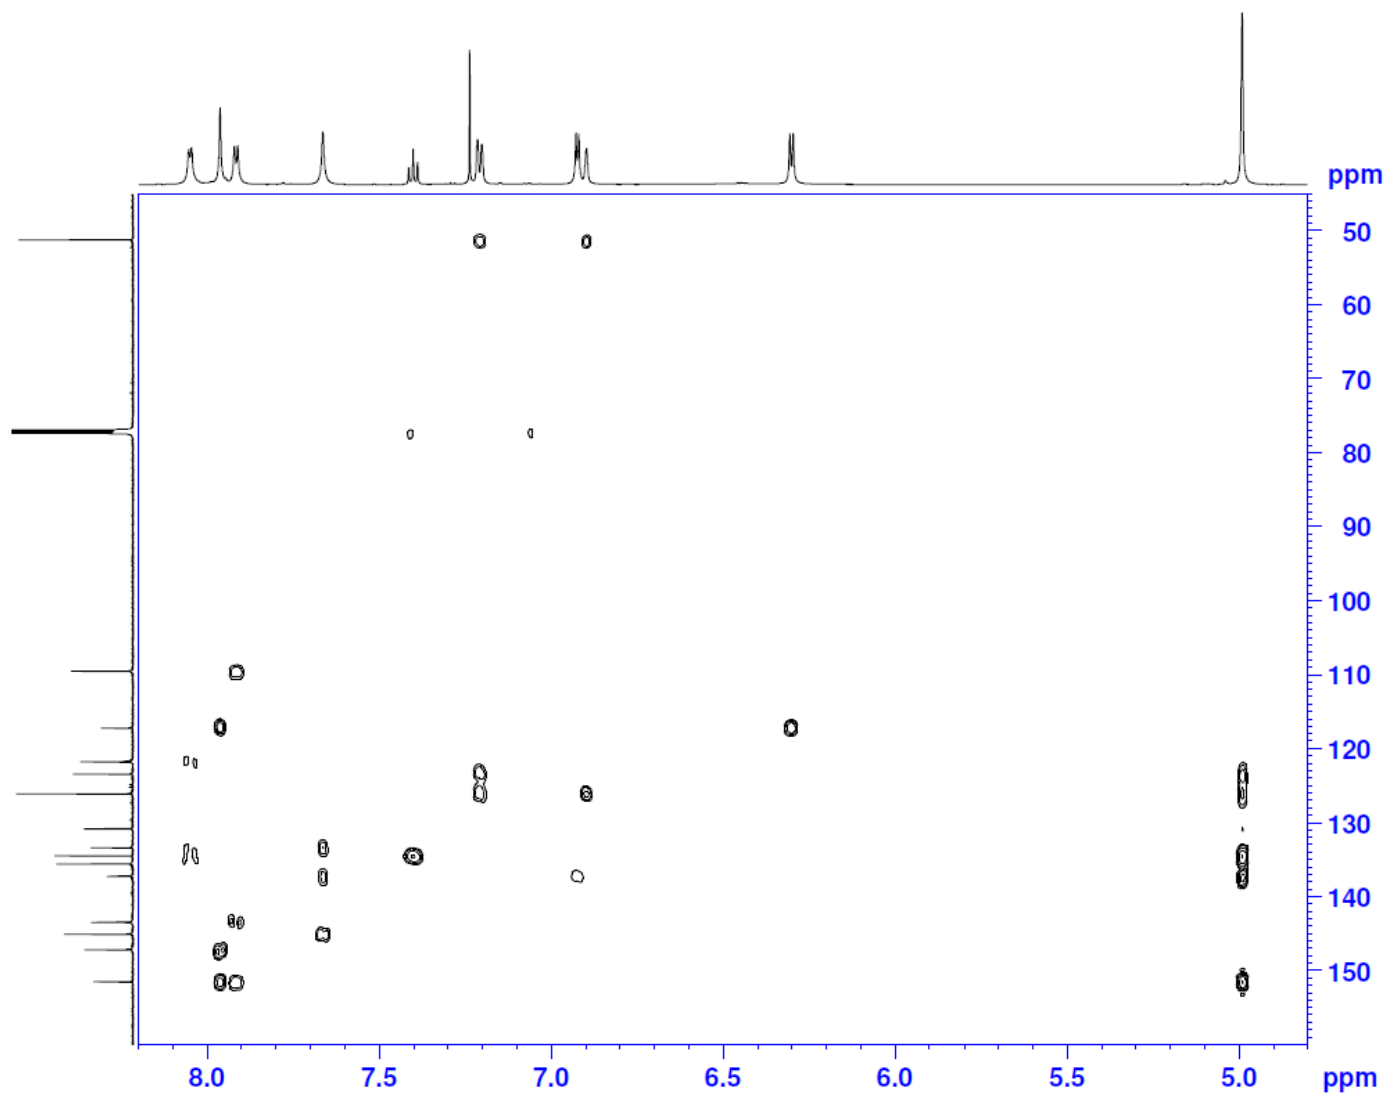

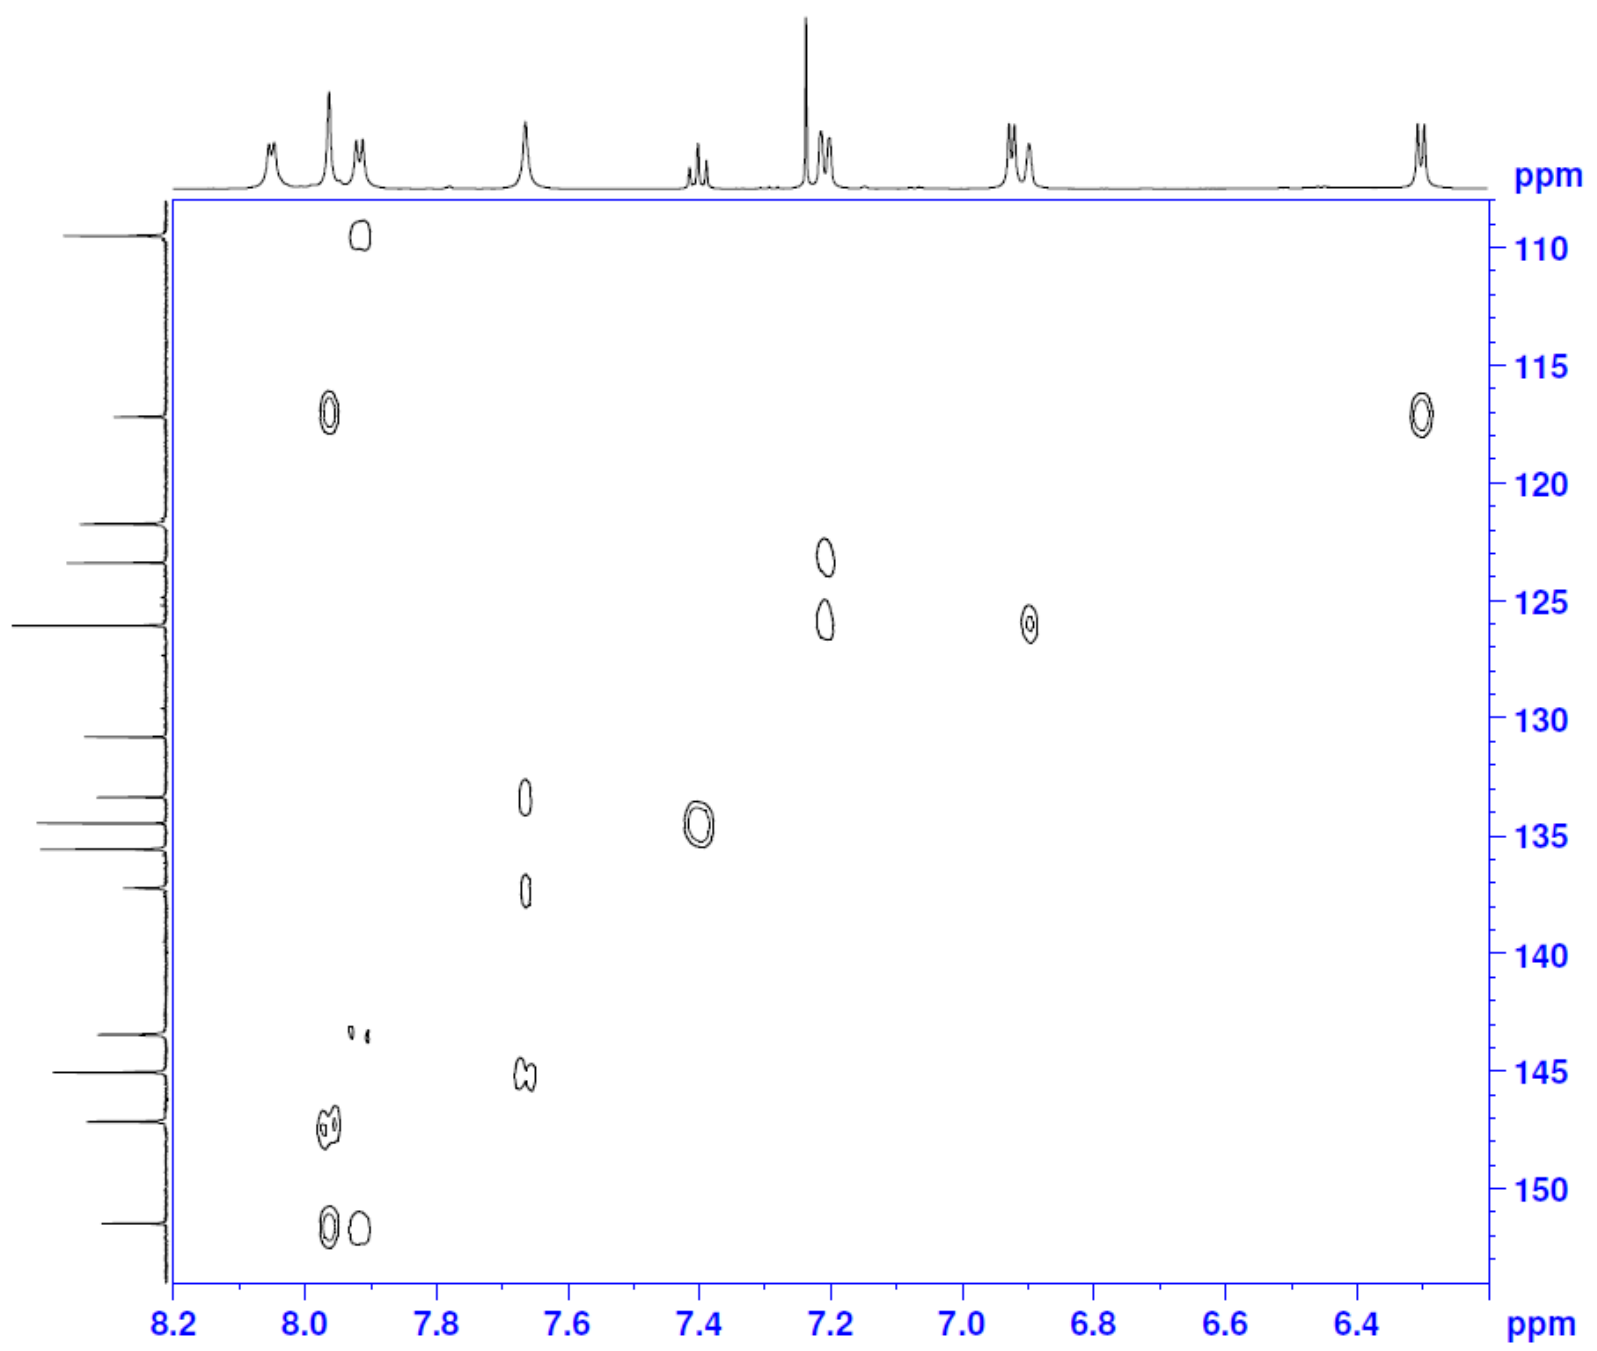

HR MS of 1,3-bis((10*H*-dipyrido[3,4-b:3',4'-e][1,4]thiazin-10-yl)methyl)benzene (**8**)

**Analysis Info**

Analysis Name D:\Data\EM-1,6-mk.d  
 Method low\_mass\_positive.m  
 Sample Name cf3  
 Comment

Acquisition Date 1/25/2024 11:34:37 AM

Operator KM  
 Instrument impact II 1825265.10082

**Acquisition Parameter**

|             |          |                      |          |                  |           |
|-------------|----------|----------------------|----------|------------------|-----------|
| Source Type | ESI      | Ion Polarity         | Positive | Set Nebulizer    | 0.3 Bar   |
| Focus       | Active   | Set Capillary        | 4000 V   | Set Dry Heater   | 200 °C    |
| Scan Begin  | 100 m/z  | Set End Plate Offset | -500 V   | Set Dry Gas      | 3.0 l/min |
| Scan End    | 1000 m/z | Set Charging Voltage | 2000 V   | Set Divert Valve | Source    |
|             |          | Set Corona           | 0 nA     | Set APCI Heater  | 0 °C      |

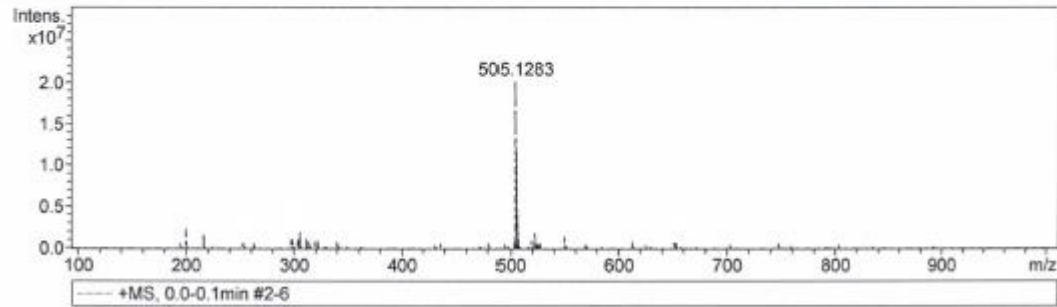

| # | m/z      | Res.  | S/N     | I        | I %   | FWHM   |
|---|----------|-------|---------|----------|-------|--------|
| 1 | 505.1283 | 17250 | 17139.0 | 20377596 | 100.0 | 0.0293 |

Mulliken charges and bond length of compound **8**

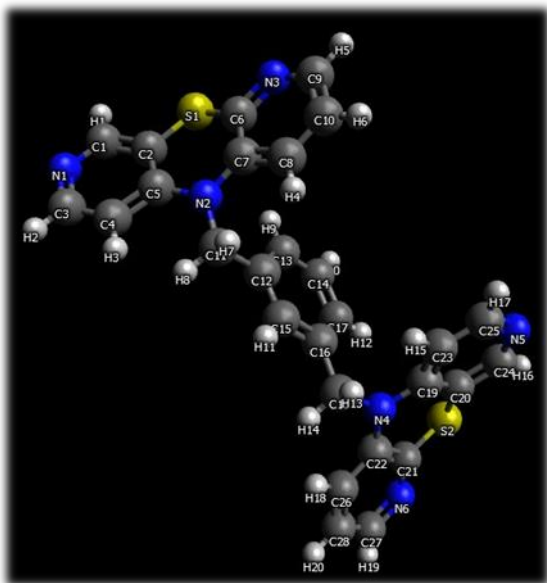

|    | Mulliken charges | Mulliken charges with hydrogens summed into heavy atoms |
|----|------------------|---------------------------------------------------------|
| N1 | -0.427727        | -0.427727                                               |
| C1 | 0.015013         | 0.180829                                                |
| C2 | -0.152921        | -0.152921                                               |
| C3 | 0.045555         | 0.198507                                                |
| C4 | -0.191700        | -0.056485                                               |
| C5 | 0.352397         | 0.352397                                                |
| S1 | 0.226982         | 0.226982                                                |
| C6 | 0.056859         | 0.056859                                                |
| C7 | 0.296058         | 0.296058                                                |
| N2 | -0.610680        | -0.610680                                               |
| C8 | -0.127497        | 0.020032                                                |
| N3 | -0.476133        | -0.476133                                               |

|     |           |           |
|-----|-----------|-----------|
| C9  | 0.050436  | 0.204382  |
| C10 | -0.152235 | -0.012615 |
| C11 | -0.225222 | 0.128715  |
| C12 | 0.133503  | 0.133503  |
| H1  | 0.188323  |           |
| H2  | 0.165614  |           |
| C13 | -0.163259 | -0.006837 |
| C14 | -0.134315 | 0.010534  |
| C15 | -0.232908 | -0.120546 |
| C16 | 0.135397  | 0.135397  |
| C17 | -0.162392 | -0.007165 |
| C18 | -0.226010 | 0.128266  |
| N4  | -0.610889 | -0.610889 |
| H3  | 0.186638  |           |
| H4  | 0.167638  |           |
| C19 | 0.332274  | 0.332274  |
| C20 | -0.154042 | -0.154042 |
| S2  | 0.227947  | 0.227947  |
| C21 | 0.057054  | 0.057054  |
| C22 | 0.316497  | 0.316497  |
| C23 | -0.178117 | -0.040481 |
| C24 | 0.013605  | 0.178961  |
| N5  | -0.428085 | -0.428085 |
| C25 | 0.044249  | 0.196072  |
| C26 | -0.141868 | 0.003138  |
| N6  | -0.473241 | -0.473241 |
| C27 | 0.050173  | 0.203738  |
| C28 | -0.149823 | -0.010295 |
| H5  | 0.139527  |           |
| H6  | 0.145007  |           |
| H7  | 0.153565  |           |
| H8  | 0.137636  |           |
| H9  | 0.151822  |           |

|     |          |  |
|-----|----------|--|
| H10 | 0.165356 |  |
| H11 | 0.156421 |  |
| H12 | 0.144849 |  |
| H13 | 0.155226 |  |
| H14 | 0.165816 |  |
| H15 | 0.152951 |  |
| H16 | 0.135215 |  |
| H17 | 0.153946 |  |
| H18 | 0.139621 |  |
| H19 | 0.147529 |  |
| H20 | 0.112362 |  |

|         | Bond length |
|---------|-------------|
| H12-C14 | 1.082536    |
| S2-C21  | 1.777657    |
| S2-C20  | 1.780656    |
| N6-C27  | 1.352689    |
| N6-C21  | 1.36038     |
| H7-C27  | 1.081798    |
| H10-C24 | 1.082544    |
| H13-C17 | 1.080121    |
| C27-C28 | 1.384542    |
| C14-C17 | 1.394971    |
| C14-C13 | 1.394959    |
| C21-C22 | 1.41607     |
| H14-C1  | 1.082619    |
| H11-C13 | 1.080132    |
| S1-C2   | 1.78099     |
| S1-C6   | 1.77774     |
| C17-C16 | 1.408731    |
| C24-C20 | 1.401356    |

|         |          |
|---------|----------|
| C24-N5  | 1.354548 |
| C20-C19 | 1.411702 |
| C13-C12 | 1.408718 |
| C1-C2   | 1.401252 |
| C1-N1   | 1.353435 |
| C28-H5  | 1.082727 |
| C28-C26 | 1.393256 |
| C22-C26 | 1.422934 |
| C22-N4  | 1.451335 |
| C2-C5   | 1.41469  |
| N1-C3   | 1.352089 |
| C6-N3   | 1.360608 |
| C6-C7   | 1.412828 |
| C26-H6  | 1.075085 |
| N5-C25  | 1.353056 |
| N3-C9   | 1.353974 |
| C19-N4  | 1.450773 |
| C19-C23 | 1.420065 |
| N4-C18  | 1.474973 |
| C16-C18 | 1.520583 |
| C16-C15 | 1.405454 |
| C5-N2   | 1.451097 |
| C5-C4   | 1.422406 |
| C12-C15 | 1.405445 |
| C12-C11 | 1.520558 |
| C3-C4   | 1.39444  |
| C3-H15  | 1.082175 |
| H17-C9  | 1.081773 |
| C9-C10  | 1.386227 |
| C7-N2   | 1.450725 |
| C7-C8   | 1.420274 |
| N2-C11  | 1.47486  |

|         |          |
|---------|----------|
| C18-H3  | 1.098364 |
| C18-H4  | 1.109715 |
| C4-H16  | 1.075286 |
| C25-C23 | 1.393811 |
| C25-H9  | 1.082018 |
| C23-H8  | 1.078169 |
| C15-H20 | 1.084335 |
| C11-H1  | 1.098566 |
| C11-H2  | 1.109779 |
| C10-C8  | 1.392768 |
| C10-H18 | 1.082556 |

|        |          |
|--------|----------|
| C8-H19 | 1.078175 |
|--------|----------|

Mulliken charges and bond length of isomer with lutidine linker of compound 8

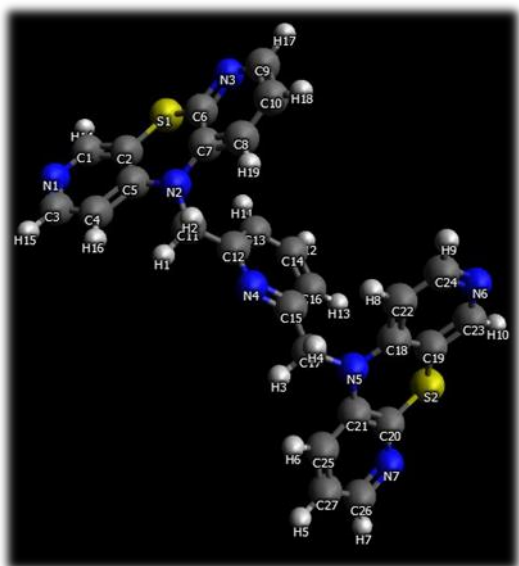

|    | Mulliken charges | Mulliken charges with hydrogens summed into heavy atoms |
|----|------------------|---------------------------------------------------------|
| N1 | -0.427145        | -0.427145                                               |
| C1 | 0.015195         | 0.181291                                                |
| C2 | -0.153020        | -0.153020                                               |
| C3 | 0.045704         | 0.200081                                                |
| C4 | -0.192632        | -0.052975                                               |
| C5 | 0.351763         | 0.351763                                                |
| S1 | 0.226860         | 0.226860                                                |
| C6 | 0.056789         | 0.056789                                                |
| C7 | 0.294820         | 0.294820                                                |
| N2 | -0.610996        | -0.610996                                               |
| C8 | -0.133740        | 0.019396                                                |

|     |           |           |
|-----|-----------|-----------|
| N3  | -0.475664 | -0.475664 |
| C9  | 0.050500  | 0.205199  |
| C10 | -0.152336 | -0.011418 |
| C11 | 0.209580  | 0.166439  |
| C12 | 0.281152  | 0.281152  |
| H1  | 0.197630  |           |
| H2  | 0.178389  |           |
| C13 | -0.160940 | 0.001179  |
| C14 | -0.103189 | 0.051315  |
| N4  | -0.559045 | -0.559045 |
| C15 | 0.282848  | 0.282848  |
| C16 | -0.160077 | 0.000931  |
| C17 | -0.210322 | 0.166048  |
| N5  | -0.611086 | -0.611086 |
| H3  | 0.195979  |           |
| H4  | 0.180390  |           |
| C18 | 0.330886  | 0.330886  |
| C19 | -0.154002 | -0.154002 |
| S2  | 0.227613  | 0.227613  |
| C20 | 0.057070  | 0.057070  |
| C21 | 0.315746  | 0.315746  |
| C22 | -0.184507 | -0.041120 |
| C23 | 0.013551  | 0.179562  |
| N6  | -0.427495 | -0.427495 |
| C24 | 0.044361  | 0.197463  |
| C25 | -0.142581 | 0.006757  |
| N7  | -0.473135 | -0.473135 |
| C26 | 0.050528  | 0.204771  |
| C27 | -0.149863 | -0.008877 |
| H5  | 0.140986  |           |
| H6  | 0.149338  |           |
| H7  | 0.154243  |           |
| H8  | 0.143386  |           |

|     |          |  |
|-----|----------|--|
| H9  | 0.153102 |  |
| H10 | 0.166011 |  |
| H11 | 0.162118 |  |
| H12 | 0.154504 |  |
| H13 | 0.161008 |  |
| H14 | 0.166096 |  |
| H15 | 0.154376 |  |
| H16 | 0.139657 |  |
| H17 | 0.154698 |  |
| H18 | 0.140919 |  |
| H19 | 0.153136 |  |

|         | <b>Bond length</b> |
|---------|--------------------|
| H12-C14 | 1.082487           |
| S2-C20  | 1.777696           |
| S2-C19  | 1.780705           |
| N7-C26  | 1.352717           |
| N7-C20  | 1.360384           |
| H7-C26  | 1.0818             |
| H13-C16 | 1.080239           |
| H10-C23 | 1.082531           |
| C14-C16 | 1.393761           |
| C14-C13 | 1.393762           |
| C26-C27 | 1.384579           |
| C20-C21 | 1.41603            |
| H14-C1  | 1.082615           |
| H11-C13 | 1.080244           |
| S1-C2   | 1.781004           |
| S1-C6   | 1.777754           |
| C16-C15 | 1.407115           |
| C19-C23 | 1.401352           |
| C19-C18 | 1.411706           |
| C23-N6  | 1.354565           |

|         |          |
|---------|----------|
| C13-C12 | 1.407103 |
| C1-C2   | 1.401258 |
| C1-N1   | 1.353448 |
| C27-H5  | 1.082731 |
| C27-C25 | 1.39325  |
| C21-C25 | 1.422866 |
| C21-N5  | 1.451259 |
| C2-C5   | 1.414673 |
| N1-C3   | 1.352104 |
| C6-N3   | 1.360615 |
| C6-C7   | 1.412843 |
| C25-H6  | 1.07513  |
| N3-C9   | 1.353976 |
| N6-C24  | 1.353061 |
| C18-N5  | 1.450701 |
| C18-C22 | 1.420006 |
| N5-C17  | 1.474971 |
| C15-C17 | 1.515774 |
| C15-N4  | 1.361722 |
| C5-N2   | 1.45103  |
| C5-C4   | 1.422356 |
| C12-N4  | 1.361705 |
| C12-C11 | 1.515743 |
| C3-C4   | 1.394443 |
| C3-H15  | 1.082173 |
| C7-N2   | 1.450676 |
| C7-C8   | 1.420237 |
| N2-C11  | 1.474857 |
| H17-C9  | 1.081781 |
| C9-C10  | 1.386228 |
| C4-H16  | 1.075307 |
| C17-H3  | 1.098097 |

|         |          |
|---------|----------|
| C17-H4  | 1.109297 |
| C24-C22 | 1.393837 |
| C24-H9  | 1.082016 |
| C22-H8  | 1.078162 |
| C11-H1  | 1.098285 |
| C11-H2  | 1.109352 |
| C8-C10  | 1.392785 |

|         |          |
|---------|----------|
| C8-H19  | 1.078165 |
| C10-H18 | 1.082559 |
